# Supplementary material for: Ruthenium biimidazole complexes as anion receptors
Source: Royal Society of Chemistry journal article supplement (doi:10.1039/b510016j), 2005-11-14

## Ruthenium biimidazole complexes as anion receptors

Laura Ion,<sup>a</sup> Dolores Morales,<sup>\*a</sup> Julio Pérez,<sup>\*a</sup> Lucía Riera,<sup>a</sup> Víctor Riera,<sup>a</sup>  
Richard A. Kowenicki,<sup>b</sup> and Mary McPartlin<sup>c</sup>

<sup>a</sup> Departamento de Química Orgánica e Inorgánica-IUQOEM, Facultad de Química-CSIC, Universidad de Oviedo, Oviedo 33006, Spain. Fax: 34 98510 3446; Tel: 34 98510 3465; E-mail: japm@fq.uniovi.es

<sup>b</sup> Chemistry Department, University of Cambridge, Lensfield Road, Cambridge CB2 1EW, United Kingdom.

<sup>c</sup> Department of Health and Human Sciences, London Metropolitan University, Holloway Road, London N7 8DB, United Kingdom.

### *X-ray crystallographic studies of the adducts [RuCl(cym)(H<sub>2</sub>biim)]<sup>+</sup>·Cl<sup>-</sup> and [RuCl(cym)(H<sub>2</sub>biim)]<sup>+</sup>·NO<sub>3</sub><sup>-</sup>*

Crystals of the adducts [RuCl(cym)(H<sub>2</sub>biim)]<sup>+</sup>·Cl<sup>-</sup> and [RuCl(cym)(H<sub>2</sub>biim)]<sup>+</sup>·NO<sub>3</sub><sup>-</sup> were mounted directly from solution under argon using an inert oil which protects them from atmospheric oxygen and moisture. X-ray intensity data were collected using a Nonius Kappa CCD diffractometer. The structures were solved by direct methods and refined by full-matrix least squares on  $F^2$ .<sup>1</sup> The structure of adduct [RuCl(cym)(H<sub>2</sub>biim)]<sup>+</sup>·Cl<sup>-</sup> contains two molecules per asymmetric unit. One of the chloride anions [Cl(2)] exhibited disorder and was resolved into two components of *ca.* 75:25 occupancy. Within the lattice of [RuCl(cym)(H<sub>2</sub>biim)]<sup>+</sup>·Cl<sup>-</sup> there are also two half molecules of dichloromethane and a total of two molecules of water per equivalent position. In addition there is residual electron density of *ca.* three electrons in a chemically unreasonable position possibly due to a small amount of a cocrystallised contaminant. All the hydrogen atoms of the adducts [RuCl(cym)(H<sub>2</sub>biim)]<sup>+</sup>·Cl<sup>-</sup> and [RuCl(cym)(H<sub>2</sub>biim)]<sup>+</sup>·NO<sub>3</sub><sup>-</sup> were included in idealised positions.

1. G. M. Sheldrick, SHELX-97; University of Göttingen, Göttingen, Germany, 1997.

*<sup>1</sup>H NMR titration profiles of 1 in DMSO-d<sub>6</sub>.*

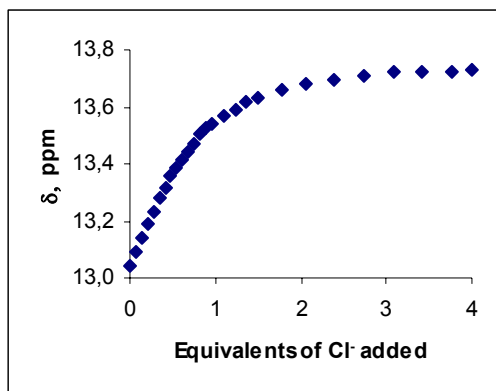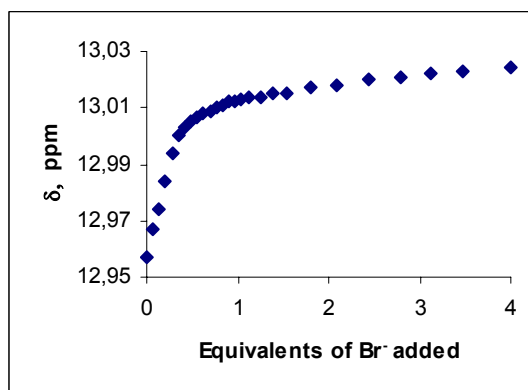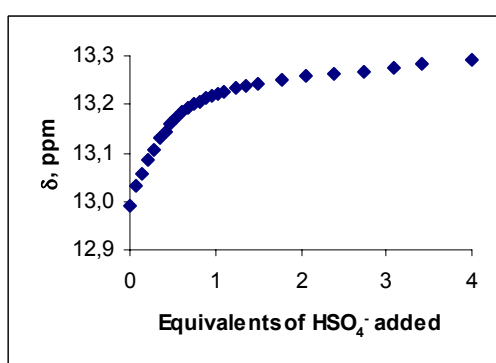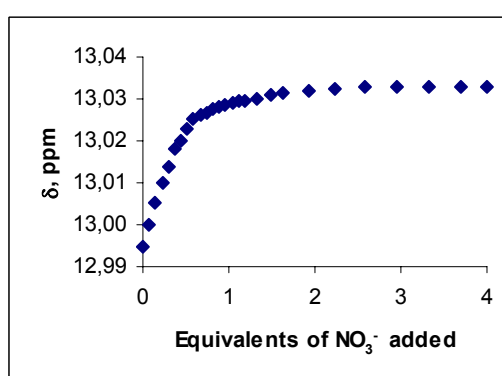

*<sup>1</sup>H NMR titration profiles of 1 in CD<sub>3</sub>CN.*

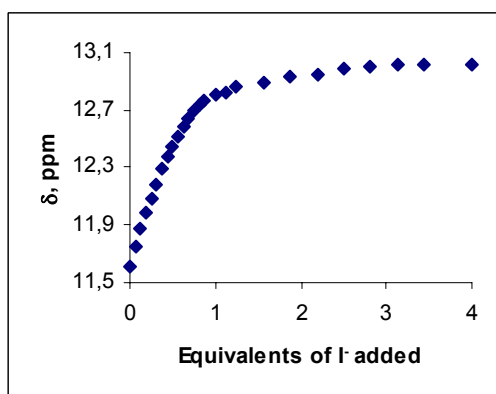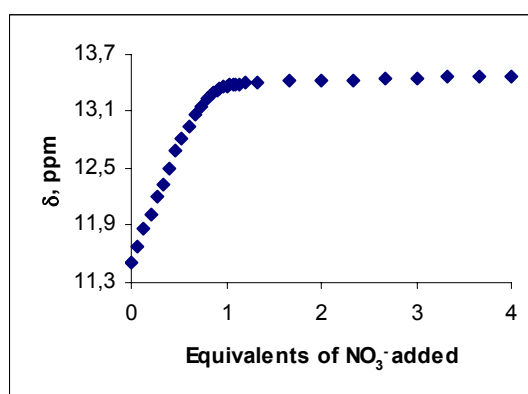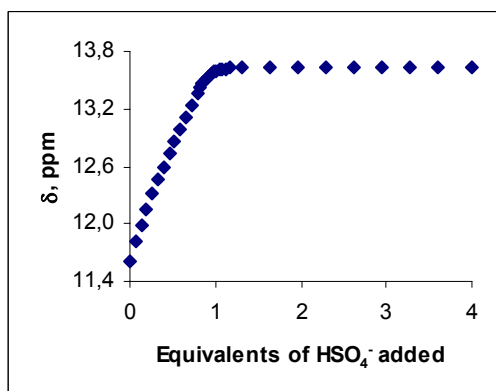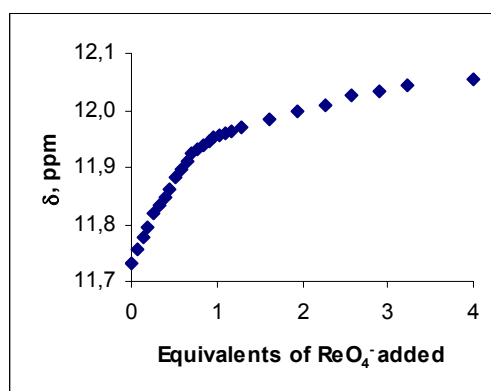

Supplement: b510016j.pdf [file b510016j.pdf]
